# Supplementary material for: Effects of Mixed Decomposition of Pinus sylvestris var. mongolica and Morus alba Litter on Microbial Diversity
Source: MDPI journal article supplement (doi:10.3390/microorganisms10061117), 2022-05-28
Supplement: s1 [file s1]

# Supplementary Material

## Effects of mixed decomposition of *Pinus sylvestris* var. *mongolica* and *Morus alba* litter on microbial diversity

Jiaying Liu <sup>1,3</sup>, Yawei Wei <sup>1,2</sup>, You Yin <sup>1</sup>, Keye Zhu <sup>1</sup>, Yuting Liu <sup>1</sup>, Hui Ding <sup>1</sup>, Jiawei Lei <sup>1</sup>, Wenxu Zhu <sup>1,2\*</sup> and Yongbin Zhou <sup>3,4\*</sup>

<sup>1</sup> College of Forestry, Shenyang Agricultural University, Shenyang, China; ljying222@163.com (J.L.); 2013500010@syau.edu.cn (Y.W.); 1993500012@syau.edu.cn (Y.Y.); ansizky@163.com (K.Z.); lyt\_edu@163.com (Y.L.); a15502410421@163.com (H.D.); leijiwei123456@163.com (W.L.); zhuwx@syau.edu.cn (W.Z.)

<sup>2</sup> Research Station of Liaohe-River Plain Forest Ecosystem, Chinese Forest Ecosystem Research Network (CFERN), Shenyang Agricultural University, Tieling, China; 2013500010@syau.edu.cn (Y.W.); zhuwx@syau.edu.cn (W.Z.)

<sup>3</sup> Institute of Modern Agricultural Research, Dalian University, Dalian, China; ljying222@163.com (J.L.); 1999500010@syau.edu.cn (Y.Z.)

<sup>4</sup> Life Science and Technology College, Dalian University, Dalian, China; 1999500010@syau.edu.cn (Y.Z.)

\*Correspondence: zhuwx@syau.edu.cn; 1999500010@syau.edu.cn Tel.: (86-13998160246)

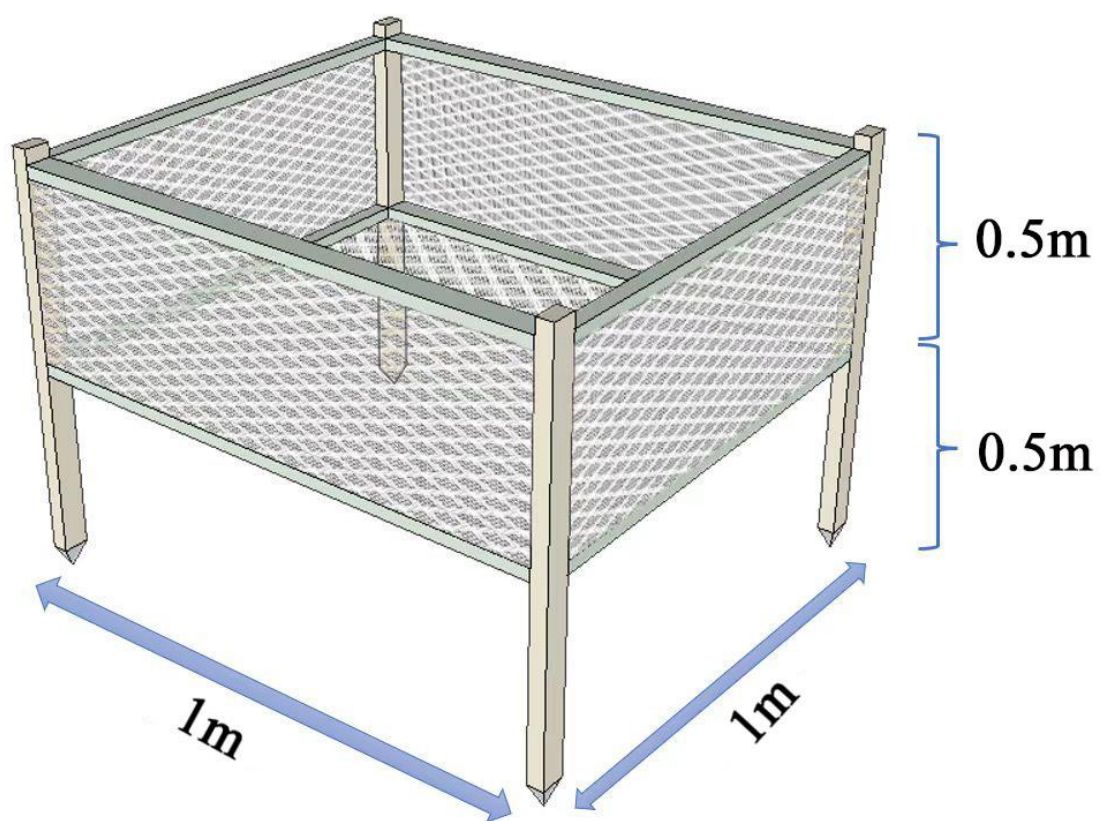

**Figure S1.** Litter collector. The size of the litter collector is 1m x 1m.
